# Supplementary material for: Stable Redox-Cycling Nitroxide Tempol Has Antifungal and Immune-Modulatory Properties
Source: PubMed Central journal article supplement (PMC6710993; doi:10.3389/fmicb.2019.01843), 2019-08-20
Supplement: Table_1.pdf [file Table_1.pdf]

**Table S1. *In vitro* activity of tempol against *C. glabrata* ATCC 90030 assessed by 3 different methods.**

| IC and MFC of tempol against <i>C. glabrata</i> |                  |                           |                    |
|-------------------------------------------------|------------------|---------------------------|--------------------|
| Tempol                                          | ATP              | OD <sub>530</sub><br>(nm) | Agar-spot<br>assay |
| Tested Concentration range (mg/ml)              | <b>0.05 - 17</b> | <b>0.05 - 17</b>          | -                  |
| IC <sub>90</sub> <sup>a</sup>                   | <b>1.4</b>       | <b>1.4</b>                | -                  |
| IC <sub>50</sub> <sup>b</sup>                   | <b>0.3</b>       | <b>0.5</b>                | -                  |
| MFC <sup>c</sup>                                | -                | -                         | <b>1.4</b>         |

<sup>a,b</sup> Inhibitory concentration (IC) was determined as the lowest concentration of tempol that inhibited fungal growth at  $\geq 90\%$  IC<sub>90</sub><sup>a</sup> or  $\geq 50\%$  IC<sub>50</sub><sup>b</sup>; Data from three independent experiments. <sup>c</sup>Minimum fungicidal concentration (MFC) was determined as the lowest concentration of tempol that killed at least 99.9% of the initial inoculum. Data from three independent experiments.
