# Supplementary material for: Stable Redox-Cycling Nitroxide Tempol Has Antifungal and Immune-Modulatory Properties
Source: PubMed Central journal article supplement (PMC6710993; doi:10.3389/fmicb.2019.01843), 2019-08-20
Supplement: Table_2.pdf [file Table_2.pdf]

**Table S2. *In vitro* activity of tempol against *C. albicans* and *C. glabrata* clinical isolates using ATP quantification.**

| <b>Susceptibility of clinical <i>Candida</i> isolates in response to tempol</b>                                                                                                                                                                                                                                                                                                                                                                                          |      |      |      |
|--------------------------------------------------------------------------------------------------------------------------------------------------------------------------------------------------------------------------------------------------------------------------------------------------------------------------------------------------------------------------------------------------------------------------------------------------------------------------|------|------|------|
| <b>Tested concentration range (mg/ml) 0.05 - 17</b>                                                                                                                                                                                                                                                                                                                                                                                                                      |      |      |      |
| <u><i>C. albicans</i> clinical strains</u>                                                                                                                                                                                                                                                                                                                                                                                                                               |      |      |      |
|                                                                                                                                                                                                                                                                                                                                                                                                                                                                          | CA40 | CA75 | CA79 |
| IC <sub>90</sub> <sup>a</sup>                                                                                                                                                                                                                                                                                                                                                                                                                                            | 1.26 | 1.84 | 1.85 |
| IC <sub>50</sub> <sup>b</sup>                                                                                                                                                                                                                                                                                                                                                                                                                                            | 0.17 | 0.33 | 0.40 |
| <u><i>C. glabrata</i> clinical strains</u>                                                                                                                                                                                                                                                                                                                                                                                                                               |      |      |      |
|                                                                                                                                                                                                                                                                                                                                                                                                                                                                          | CG67 | CG77 | CG71 |
| IC <sub>90</sub> <sup>a</sup>                                                                                                                                                                                                                                                                                                                                                                                                                                            | 1.92 | 2.53 | 3.63 |
| IC <sub>50</sub> <sup>a</sup>                                                                                                                                                                                                                                                                                                                                                                                                                                            | 0.26 | 0.40 | 0.46 |
| <p><sup>a,b</sup> Inhibitory concentration (IC) was determined as the lowest concentration of tempol that inhibited fungal growth at ≥90% <sup>a</sup>IC<sub>90</sub><sup>a</sup> or ≥50% IC<sub>50</sub><sup>b</sup>; Data from three independent experiments. <sup>c</sup>Minimum fungicidal concentration (MFC) was determined as the lowest concentration of tempol that killed at least 99.9% of the initial inoculum. Data from three independent experiments.</p> |      |      |      |
