# Supplementary material for: Stable Redox-Cycling Nitroxide Tempol Has Antifungal and Immune-Modulatory Properties
Source: PubMed Central journal article supplement (PMC6710993; doi:10.3389/fmicb.2019.01843), 2019-08-20
Supplement: Table_4.pdf [file Table_4.pdf]

**Table S4. Name and function of the differentially expressed *C. albicans* genes affected upon tempol challenge.**

| Gene           | Expression / function                                                                                                 | Deregulated by other antifungal compounds                        | Relevant references                                          |
|----------------|-----------------------------------------------------------------------------------------------------------------------|------------------------------------------------------------------|--------------------------------------------------------------|
| <i>PGA7</i>    | GPI-linked hyphal surface antigen important for iron assimilation                                                     | Azoles                                                           | (Liu et al., 2005)<br>(Synnott et al., 2010)                 |
| <i>RBT5</i>    | Rbt5p is glycosylphosphatidylinositol (GPI)-modified cell wall protein. Expression is induced by iron limitation      | Ketoconazole, ciclopirox olamine, caspofungin and amphotericin B | (Kronstad et al., 2013)<br>(Lee et al., 2005)                |
| <i>CSA1</i>    | Surface antigen on elongating hyphae and buds                                                                         | Ciclopirox                                                       | (Sigle et al., 2005a)                                        |
| <i>FET34</i>   | Multicopper ferroxidase; induced by low iron                                                                          | Ciclopirox olamine and ketoconazole                              | (Rogers and Barker, 2002;Liu et al., 2005)                   |
| <i>FRP1</i>    | Ferric reductase                                                                                                      | Fluconazole and ciclopirox                                       | (Copping et al., 2005)                                       |
| <i>FTR1</i>    | High-affinity iron permease                                                                                           | Amphotericin B, caspofungin, ciclopirox,                         | (Niewerth et al., 2003;Lee et al., 2005;Sigle et al., 2005b) |
| <i>CDC21</i>   | Putative thymidylate synthase                                                                                         | Fluconazole                                                      | (Liu et al., 2005)                                           |
| <i>DUT1</i>    | dUTP pyrophosphatase                                                                                                  |                                                                  |                                                              |
| <i>RNR1</i>    | Ribonucleotide reductase large subunit; induced in low iron                                                           |                                                                  |                                                              |
| <i>MSH2</i>    | Putative DNA mismatch repair factor                                                                                   | Flucytosine                                                      | (Liu et al., 2005)                                           |
| <i>PDS5</i>    | Putative protein with a predicted role in establishment and maintenance of sister chromatid condensation and cohesion |                                                                  |                                                              |
| <i>PMS1</i>    | Putative DNA mismatch repair factor                                                                                   |                                                                  | (Legrand et al., 2007)                                       |
| <i>POL30</i>   | Proliferating cell nuclear antigen (PCNA)                                                                             | Flucytosine                                                      | (Liu et al., 2005)                                           |
| <i>RAD51</i>   | Protein involved in homologous recombination and DNA repair                                                           |                                                                  | (Liu et al., 2005)                                           |
| <i>RAD57</i>   | Putative DNA recombination and repair protein                                                                         |                                                                  |                                                              |
| <i>RFA1</i>    | Putative DNA replication factor A                                                                                     |                                                                  |                                                              |
| <i>TUB1</i>    | Alpha-tubulin                                                                                                         |                                                                  |                                                              |
| <i>ADE 5,7</i> |                                                                                                                       |                                                                  |                                                              |
| <i>ADE2</i>    | Phosphoribosylaminoimidazole carboxylase activity                                                                     |                                                                  |                                                              |
| <i>ADE6</i>    | 5-Phosphoribosylformyl glycinamide synthetase                                                                         |                                                                  |                                                              |
| <i>GCV2</i>    | Glycine decarboxylase P subunit; protein of glycine catabolism                                                        |                                                                  |                                                              |
| <i>GCV1</i>    | Putative T subunit of glycine decarboxylase                                                                           |                                                                  |                                                              |
| <i>MSS116</i>  | Putative DEAD-box protein                                                                                             |                                                                  |                                                              |

|                   |                                                                                                          |  |  |
|-------------------|----------------------------------------------------------------------------------------------------------|--|--|
| <i>orf19.5701</i> | Role in DNA replication initiation                                                                       |  |  |
| <i>RPO41</i>      | Putative mitochondrial RNA polymerase                                                                    |  |  |
| <i>orf19.2631</i> | Subunit of Elongator complex                                                                             |  |  |
| <i>orf19.5038</i> | Predicted tRNA (guanine) methyltransferase activity                                                      |  |  |
| <i>orf19.512</i>  | <i>S. cerevisiae</i> ortholog is essential and is required for biogenesis of the small ribosomal subunit |  |  |
| <i>PUS7</i>       | Pseudouridine synthase;                                                                                  |  |  |
